# Supplementary material for: Isolation of Decidual Macrophages and Hofbauer Cells from Term Placenta—Comparison of the Expression of CD163 and CD80
Source: MDPI journal article supplement (doi:10.3390/ijms23116113), 2022-05-30
Supplement: s1 [file s1]

## Supplement

### Decidua

|                   | Gestational age | Sex   | Birth weight | Maternal age | Birthmode |
|-------------------|-----------------|-------|--------------|--------------|-----------|
| <b>Spearman r</b> | -0.452          | 0.109 | -0.381       | 0.095        | -0.218    |
| <b>p value</b>    | 0.268           | 0.886 | 0.360        | 0.840        | 0.686     |

Supplementary Table S1: Spearman correlation of the percentage of CD68<sup>+</sup> cells of all isolated decidual cells and different patient characteristics; \* significant  $p < 0.05$ .

### Hofbauer

|                   | Gestational age | Sex   | Birth weight | Maternal age | Birthmode |
|-------------------|-----------------|-------|--------------|--------------|-----------|
| <b>Spearman r</b> | 0.310           | 0.327 | 0.167        | 0.167        | 0.109     |
| <b>p value</b>    | 0.462           | 0.486 | 0.703        | 0.703        | 0.886     |

Supplementary Table S2: Spearman correlation of the percentage of CD68<sup>+</sup> cells of all isolated villous cells and different patient characteristics; \* significant  $p < 0.05$ .

## VT

| Digestion steps             | 1          | 2          | 3        |
|-----------------------------|------------|------------|----------|
| Time                        | 15min      | 20min      | 1h       |
| Temperature                 | 37°C       | 37°C       | 37°C     |
| Trypsin concentration       | 1.25mg/ml  | 0.72mg/ml  | -        |
| Collagenase A concentration | -          | -          | 1mg/ml   |
| DNase I concentration       | 0.1mg/ml   | 0.1mg/ml   | 0.1mg/ml |
| Dilution medium             | HBSS-HEPES | HBSS-HEPES | DMEM     |

Supplementary Table S3: Digestion steps for villous tissue.

## Decidua

| Digestion steps             | 1          | 2         |
|-----------------------------|------------|-----------|
| Time                        | 20min      | 1h        |
| Temperature                 | 37°C       | 37°C      |
| Trypsin concentration       | 0.72mg/ml  | -         |
| Collagenase A concentration | -          | 1mg/ml    |
| DNase I concentration       | 0.02mg/ml  | 0.02mg/ml |
| Dilution medium             | HBSS-HEPES | DMEM      |

Supplementary Table S4: Digestion steps for Decidua.

|                                     | <b>FACS (n=8)</b>           | <b>IF/IHC (n=9)</b>         |
|-------------------------------------|-----------------------------|-----------------------------|
| <b>Gestational age (weeks+days)</b> | 39+3 ± 1+0<br>(38+0 – 40+6) | 37+5 ± 1+5<br>(35+1 – 40+0) |
| <b>Maternal Age (years)</b>         | 35 ± 4<br>(28 - 40)         | 32 ± 5<br>(22-39)           |
| <b>Fetal sex</b>                    | ♂4 ♀4                       | ♂1 ♀8                       |

Supplementary Table S5: Patient characteristics of FACS and IF results. All data are shown as mean ± SD (range).

| <b>Antibody /Dye</b>                    | <b>Color</b> | <b>Species isotype</b> | <b>Manufacturer</b>                  | <b>Clone</b> | <b>Used Concentration</b> |
|-----------------------------------------|--------------|------------------------|--------------------------------------|--------------|---------------------------|
| <b>CD45</b>                             | FITC         | Mouse IgG1, κ          | BioLegend (San Diego, USA)           | HI30         | 2.0µg/ml                  |
| <b>CD163</b>                            | APC          | Mouse IgG1, κ          | BioLegend                            | GHI/61       | 2.0µg/ml                  |
| <b>CD80</b>                             | BV421        | Mouse IgG1, κ          | BioLegend                            | 2D10         | 1.6µg/ml                  |
| <b>CD68</b>                             | APC-Cy7      | Mouse IgG2b, κ         | BioLegend                            | Y1/82A       | 1.6µg/ml                  |
| <b>CK7</b>                              | PE           | Rabbit IgG             | Abcam (Cambridge, UK)                | EPR1619Y     | 4.0µg/ml                  |
| <b>7AAD</b>                             |              |                        | BD Biosciences (Franklin Lakes, USA) |              |                           |
| <b>Fixable viability dye eFluor 780</b> |              |                        | Thermofisher                         |              |                           |

Supplementary Table S6: Antibodies and dyes used for the FACS-staining.

| <b>Problem</b>                               | <b>Possible reason</b>                                                 | <b>Solution</b>                                                                                                                                                                                                                      |
|----------------------------------------------|------------------------------------------------------------------------|--------------------------------------------------------------------------------------------------------------------------------------------------------------------------------------------------------------------------------------|
| <b>Too less isolated macrophages</b>         | Tissue is too sticky                                                   | Wash with enough HBSS-HEPES between the digestion steps.                                                                                                                                                                             |
|                                              | Too less Percoll-layers                                                | Use 4 tube with Percoll layer for 150gr. VT-tissue and 2 tubes for whole (ca. 35gr.) Decidua.                                                                                                                                        |
| <b>No layer after Percoll centrifugation</b> | Wrong centrifuge setting                                               | Check the centrifuge settings again, you have to use 2100g at RT without brake.                                                                                                                                                      |
|                                              | Pancoll (1.077 gr./ml) was used instead of Percoll (1.130 gr./ml)      | Use Percoll or different centrifuge settings; With the same concentrations and settings like for Percoll, all the cells sink to the bottom of the tube with Pancoll.                                                                 |
| <b>Trophoblast contamination</b>             | Too less Percoll-layers                                                | Use 4 tubes with Percoll layer for 150gr. VT-tissue and 2 tubes for whole (ca. 35gr.) Decidua.                                                                                                                                       |
|                                              | The red and yellowish top layer from the Percoll tube were not removed | Remove the top red and yellowish layer with a different plastic Pasteur pipette before taking out the macrophages layer.                                                                                                             |
| <b>Too much red blood cell contamination</b> | Erythrocyte layer was also aspirated in the pipette                    | With the help of the plastic Pasteur pipette, the transparent layer is slowly and carefully aspirated. Too fast aspiration leads to the swirling of the erythrocytes. At the end, a thin transparent macrophages layer must be left. |
|                                              | Still too much blood in the tissue after washing                       | Scratch the tissue better before washing. Repeat the washing more often with 0.9% NaCl.                                                                                                                                              |

Supplementary Table S7: Trouble shooting.

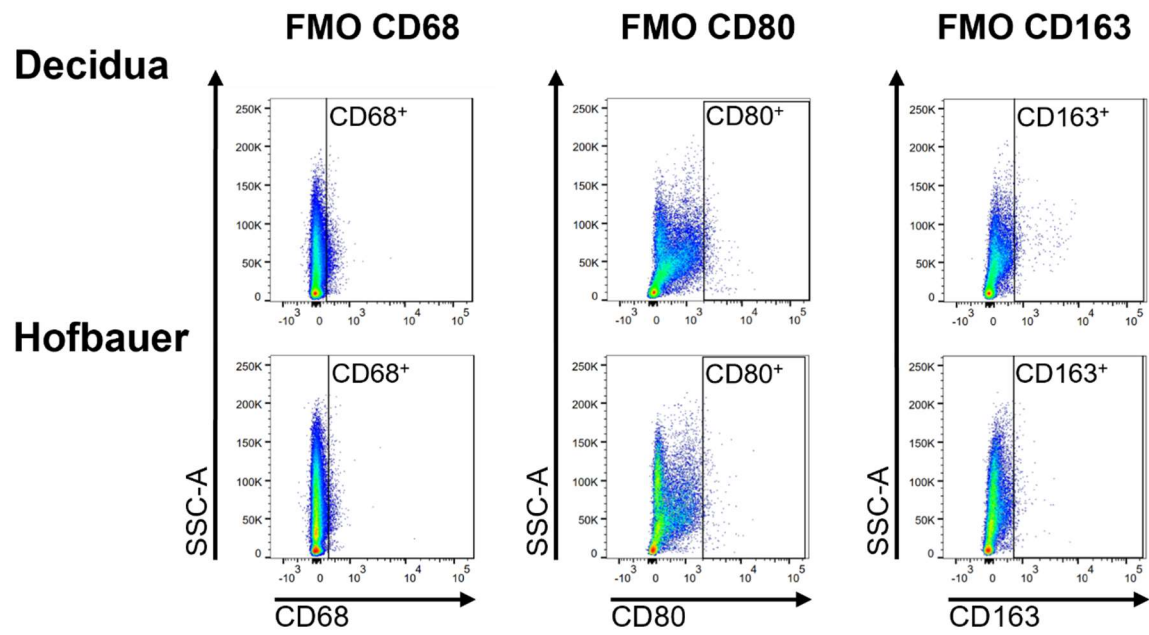

Supplementary Figure S1: FMOs for decidual and Hofbauer macrophages.

**A**

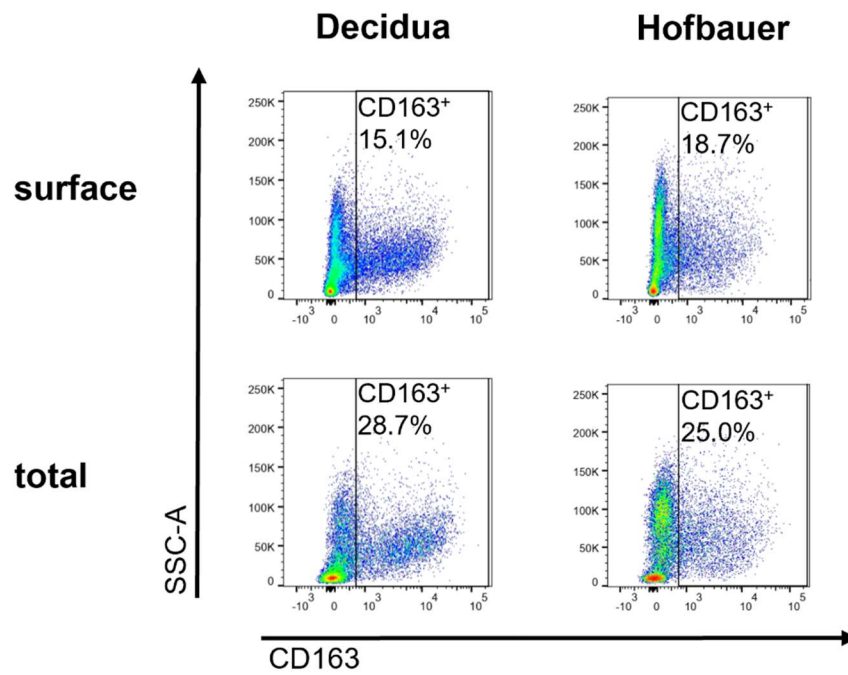

**B**

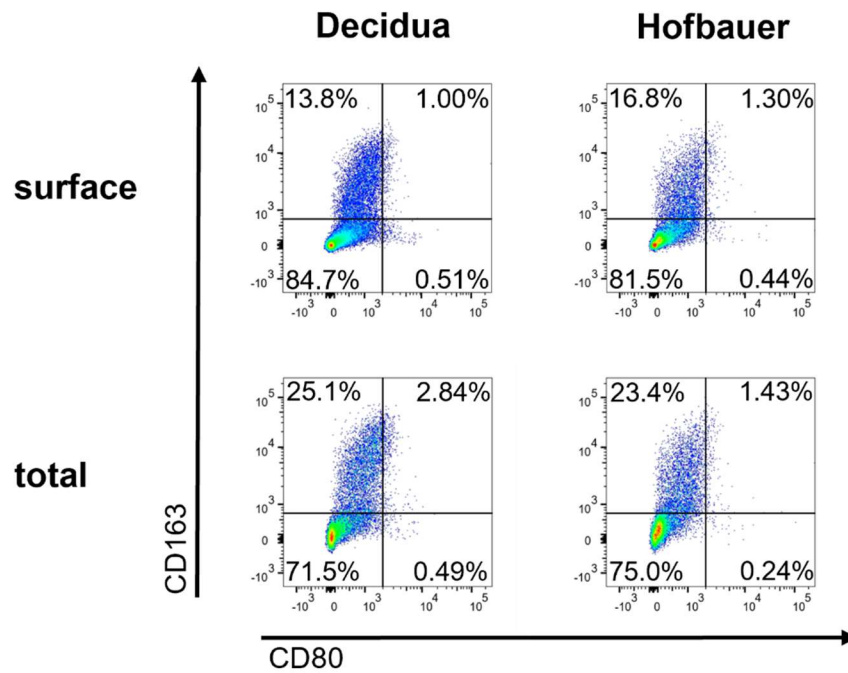

Supplementary Figure S2: Comparison of surface and total staining of CD163: FACS images of (A) CD163<sup>+</sup> macrophages and (B) CD80<sup>+</sup>CD163<sup>+</sup> macrophages.

**A**

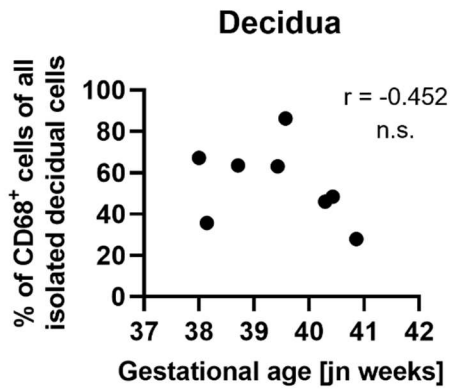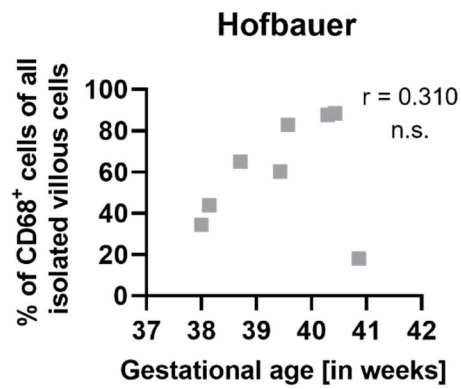

**B**

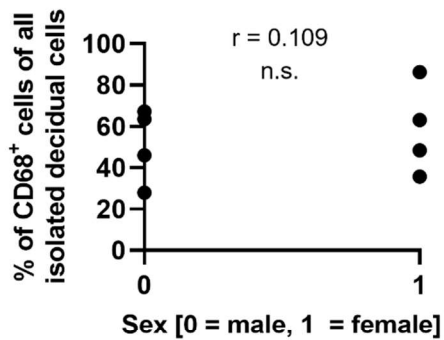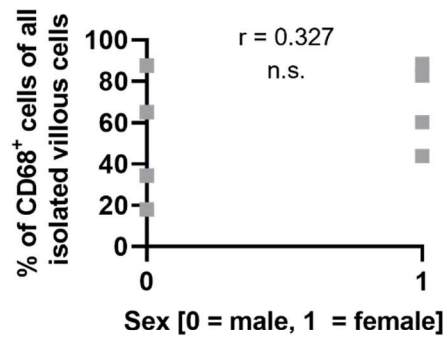

**C**

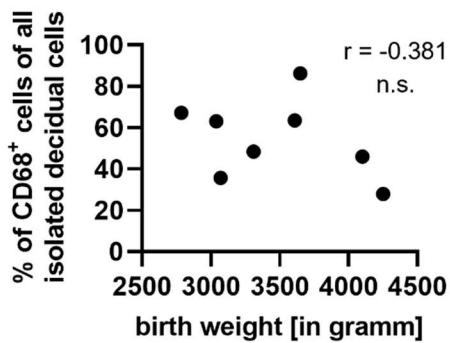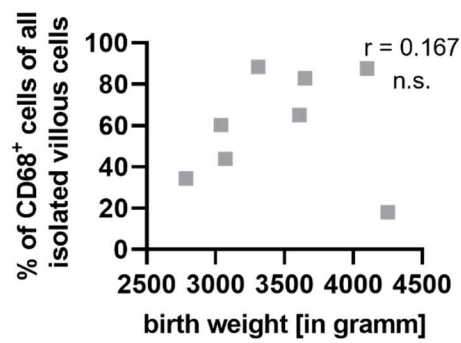

**D**

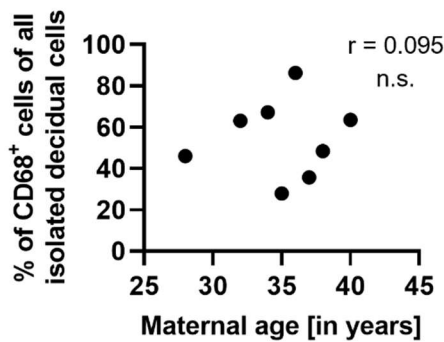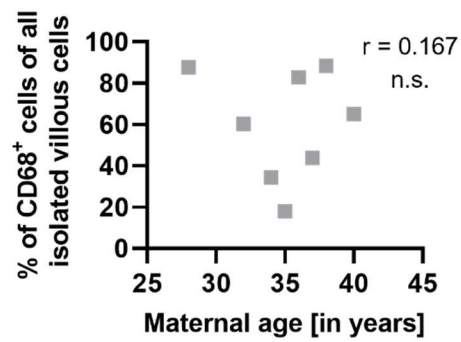

**E**

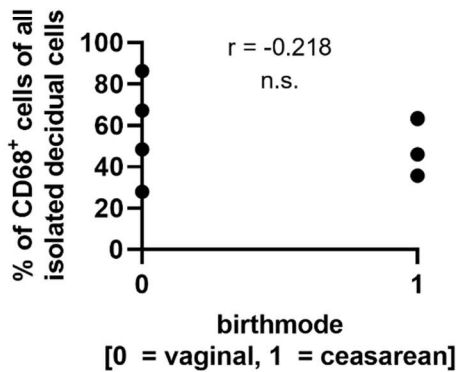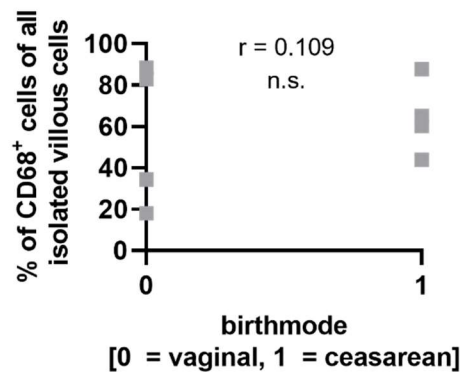



Supplementary Figure S3: Spearman correlation of the percentage of CD68<sup>+</sup> of all isolated cells of decidual and villous tissue and (A) the gestational age, (B) fetal sex, (C) birth weight, (D) maternal age and (E) birthmode; \* significant  $p < 0.05$ .

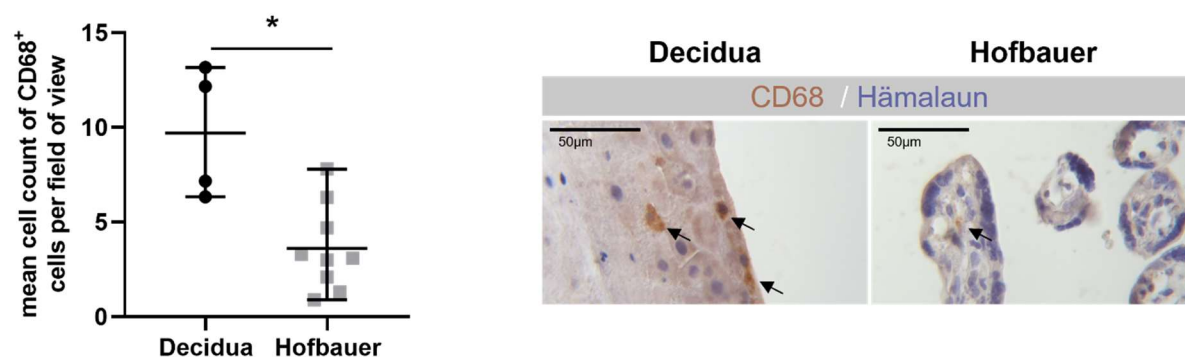

Supplementary Figure S4: Differences in the mean cell count of CD68<sup>+</sup> cells per field of view in the IHC of CD68; Doplots (as mean  $\pm$  range) and representative IHC-images; p-values were calculated with Mann-Whitney-U-Test, \* significant  $p < 0.05$ ;  $n=9$ .
